# Supplementary material
Source: Springer Nature journal article supplement (https://www.springermedizin.de/resource/supplementary/12913_2010_1374_MOESM4_ESM.pdf/9528000)

herpes zoster incidence per 100000

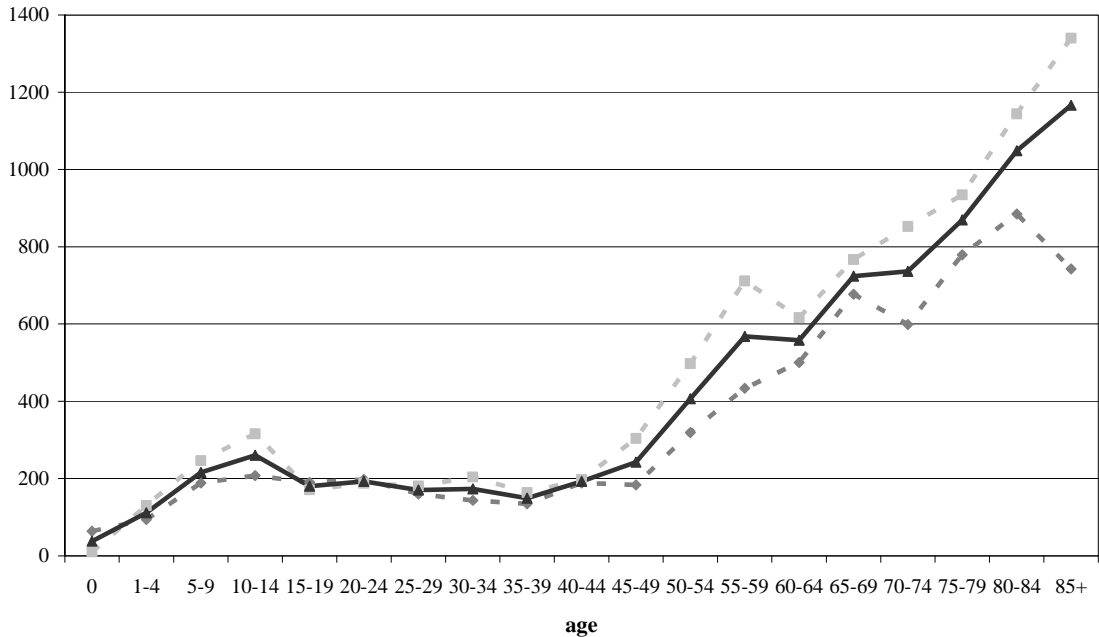

Supplement: MOESM4 [file 9528000]
